# Supplementary material for: Cellulose as sacrificial agents for enhanced photoactivated hydrogen production
Source: Royal Society of Chemistry journal article supplement (doi:10.1039/d3se00109a), 2023-01-01
Supplement: d3se00109a1.pdf [file d3se00109a1.pdf]

## Supplementary information

Enhancing photocatalytic hydrogen production by using different  
types of cellulose as sacrificial agents.

*María Isabel Alvarado-Ávila*<sup>a</sup>, *Stefano De Luca*<sup>a</sup>, *Ulrica Edlund*<sup>b</sup>, *Fei Ye*<sup>a</sup>, *Joydeep Dutta*<sup>a\*</sup>

<sup>a</sup> Functional Materials, Department of Applied Physics, School of Engineering Sciences, KTH Royal Institute of Technology, Hannes Alfvéns väg 12, 114 19 Stockholm, Sweden.

<sup>b</sup> Fibre and Polymer Technology, KTH Royal Institute of Technology, SE 100 44 Stockholm, Sweden.

\* Corresponding author.

E-mail address: joydeep@kth.se (J. Dutta)

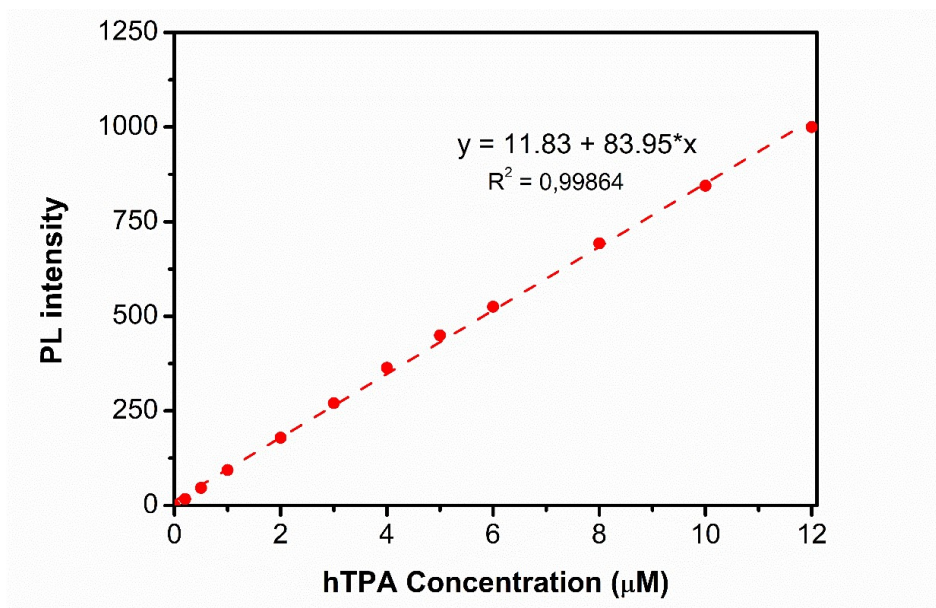

**Fig. S1** calibration curve for calculation of 2-hydroxy terephthalic acid (hTPA) concentration regarding photoluminescence (PL) intensity. The excitation wavelength corresponds to 325 nm, and the emission wavelength to 432 nm.

**Table S1** Photoluminescence intensity (PL) measured after irradiation of disodium terephthalic acid (TPA) and 0.3 mg/ml of photocatalyst solution. Emission wavelength 432 nm and excitation wavelength of 325.

| Time (min) | PL intensity     |                        |                        |                      |
|------------|------------------|------------------------|------------------------|----------------------|
|            | TiO <sub>2</sub> | 0.2Pt-TiO <sub>2</sub> | 0.5Pt-TiO <sub>2</sub> | 1Pt-TiO <sub>2</sub> |
| 0          | 0                | -0,36                  | 0,55                   | 0,77                 |
| 10         | 227,19           | 349,12                 | 298,3                  | 415,66               |
| 20         | 414,61           | 557,38                 | 599,69                 | 810,47               |
| 30         | 626,04           | 709,31                 | 897,99                 | 915,76               |

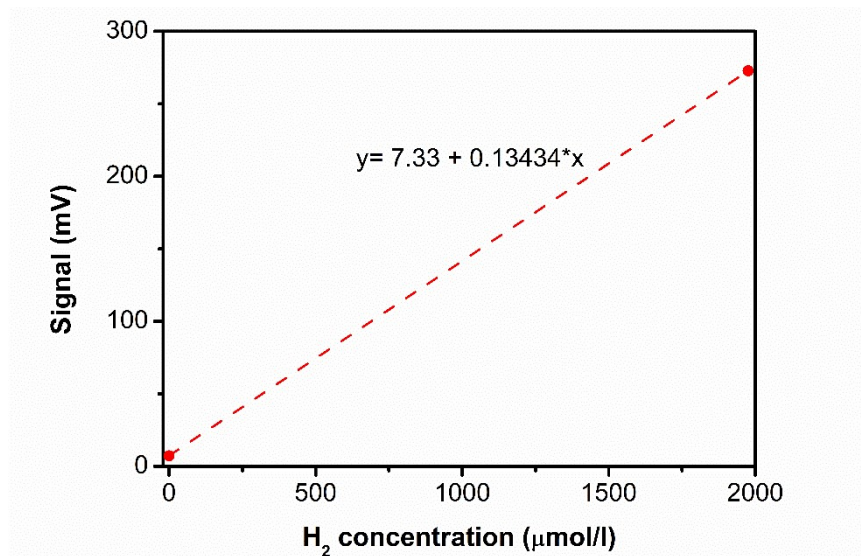

**Fig. S2** Two points calibration curve for hydrogen concentration measurement using Unisense microsensor. Calibration was performed at 40 °C.

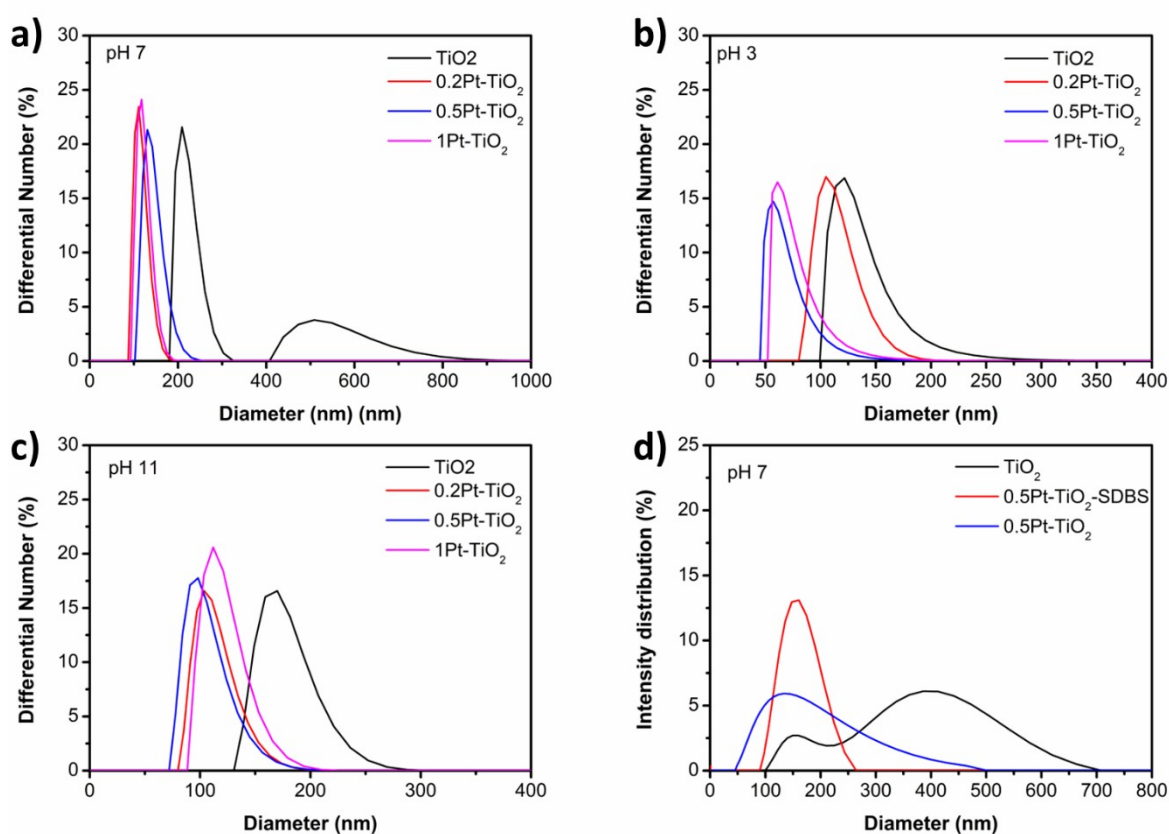

**Fig. S3** Dynamic light scattering measurements at different pH, showing the hydrodynamic diameter of bare titanium dioxide ( $\text{TiO}_2$ ), 0.2 w% of Pt loaded on  $\text{TiO}_2$  (0.5Pt-  $\text{TiO}_2$ , 0.5 w% Pt deposited on  $\text{TiO}_2$  (0.5Pt- $\text{TiO}_2$ ) and 1 w% Pt on  $\text{TiO}_2$  (1Pt- $\text{TiO}_2$ ) at a) pH 7, b) pH 3, c) pH 11 and d) intensity distribution of bare  $\text{TiO}_2$ , 0.5 w% Pt deposited on  $\text{TiO}_2$  loading using sodium dodecyl benzene sulfonate (0.5Pt-  $\text{TiO}_2$ -SDBS) and without SDBS (0.5Pt-  $\text{TiO}_2$ ).

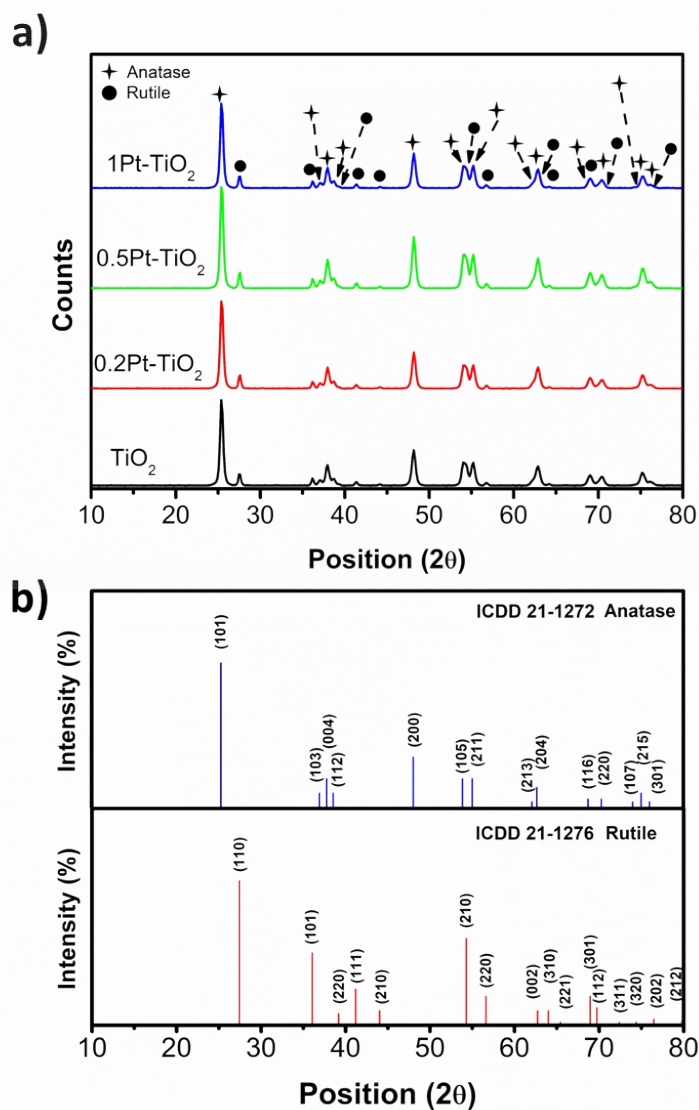

**Fig. S4** a) XRD pattern corresponding to commercial Titanium dioxide (TiO<sub>2</sub>), 0.2 w% of Pt loaded on TiO<sub>2</sub> (0.2Pt-TiO<sub>2</sub>), 0.5 w% of Pt on TiO<sub>2</sub> (0.5Pt-TiO<sub>2</sub>) and 1 w% of Pt deposited on TiO<sub>2</sub> (1Pt-TiO<sub>2</sub>). b) Anatase and Rutile phase diffractograms given by the international centre for diffraction data files N° 21-1272 and 21-1276, respectively.

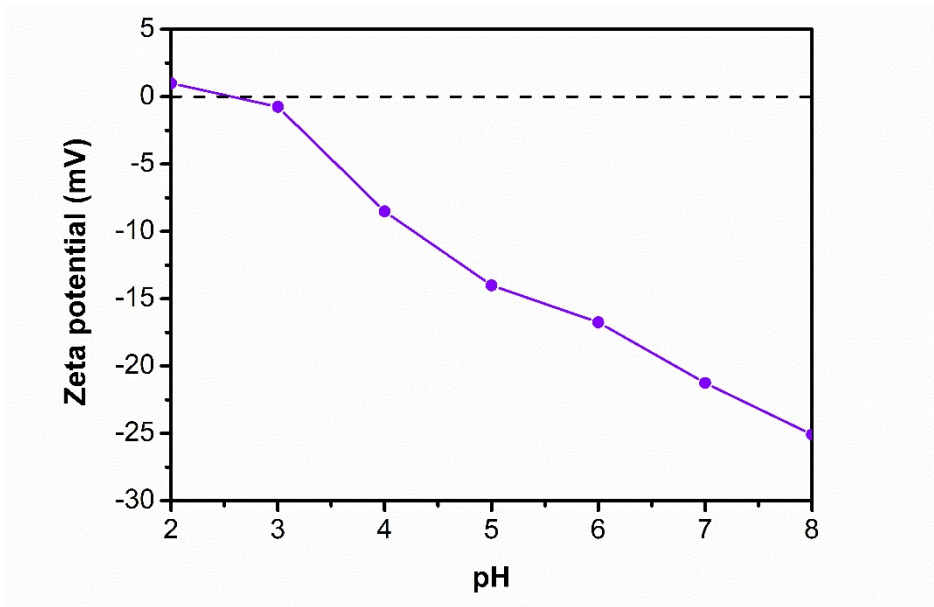

**Fig. S5** Zeta potential diagram for sodium carboxymethyl cellulose (CMC-Na)
